# Supplementary material for: Enhanced electrochemical performance of W18O49/TiN binary composite electrodes for asymmetric supercapacitors
Source: Royal Society of Chemistry journal article supplement (doi:10.1039/d6na00134c), 2026-05-20
Supplement: d6na00134c1.pdf [file d6na00134c1.pdf]

## Supporting Information

### Enhanced Electrochemical Performance of $W_{18}O_{49}/TiN$ Binary Composite Electrodes for Asymmetric Supercapacitors

Junaid Riaz <sup>1</sup>, Muhammad Arif <sup>1\*</sup>, Salah Knani <sup>2\*</sup>, Amina Bibi <sup>3\*</sup>

**Authorship:** Junaid Riaz

**Co-Authorship:** Salah Knani

**Corresponding Authorship:** Muhammad Arif, Amina Bibi

<sup>1</sup> *Yunnan Key Laboratory of Optoelectronic Information Technology, School of Physics and Electronic Information, Yunnan Normal University, Kunming 650500, China.*

<sup>2</sup> *Center for Scientific Research and Entrepreneurship, Northern Border University, Arar 73213, Saudi Arabia..*

<sup>3</sup> *Department of Physics, Hazara University, Mansehra 21300, Pakistan.*

*Email: [junaidriaz1990@gmail.com](mailto:junaidriaz1990@gmail.com), [aminaamni11@gmail.com](mailto:aminaamni11@gmail.com),*

#### Electrode Preparation

The experimental procedure related to the fabrication of the asymmetric device and electrode preparation has been revised and explained more clearly in the manuscript to improve reproducibility and reader understanding. Furthermore, for better clarity and visual understanding, two additional schematic figures have been added in the Supplementary Information section. Figure S1 illustrates the detailed synthesis procedures of  $W_{18}O_{49}$ , TiN, and the TiN- $W_{18}O_{49}$  nanocomposite, while Fig. S2 presents the step-by-step electrode preparation and asymmetric device assembly process using Ni foam. Appropriate references to these supplementary figures have also been included in the revised manuscript at the relevant sections.

These additions significantly improve the clarity, transparency, and reproducibility of the experimental methodology.

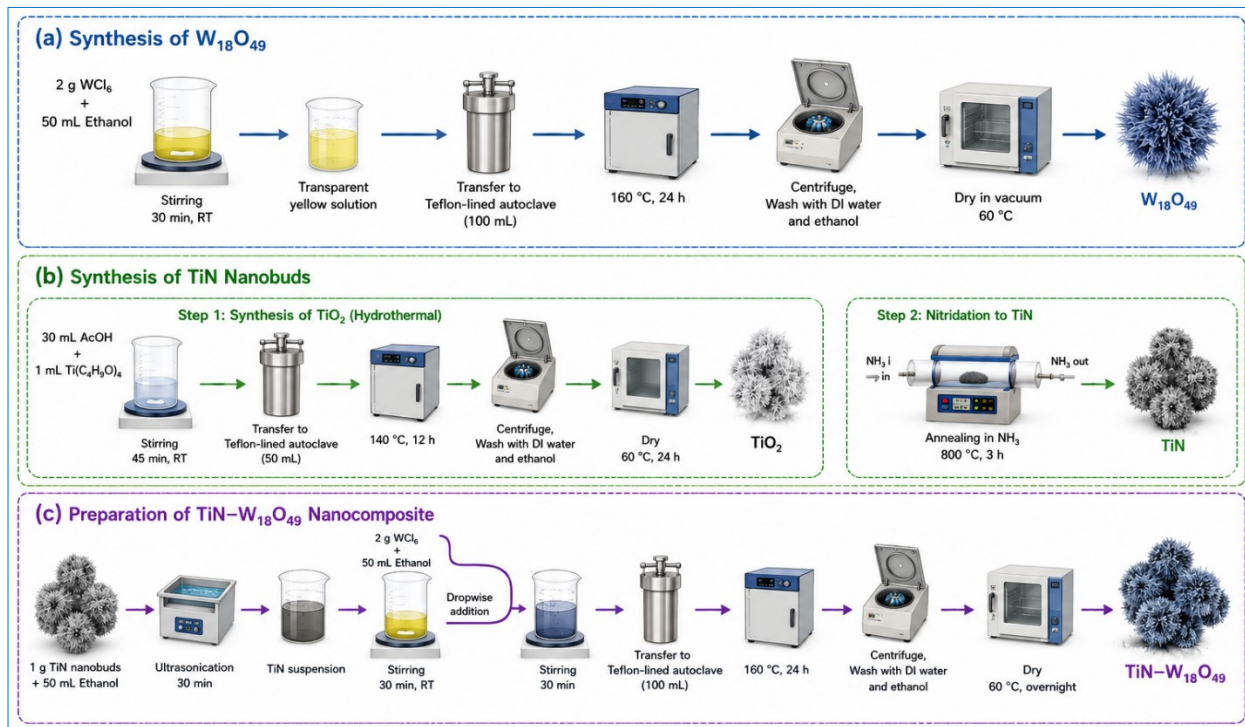

**Fig S1** Schematic representation of synthesis of  $W_{18}O_{49}$ , TiN, and TiN- $W_{18}O_{49}$  composite

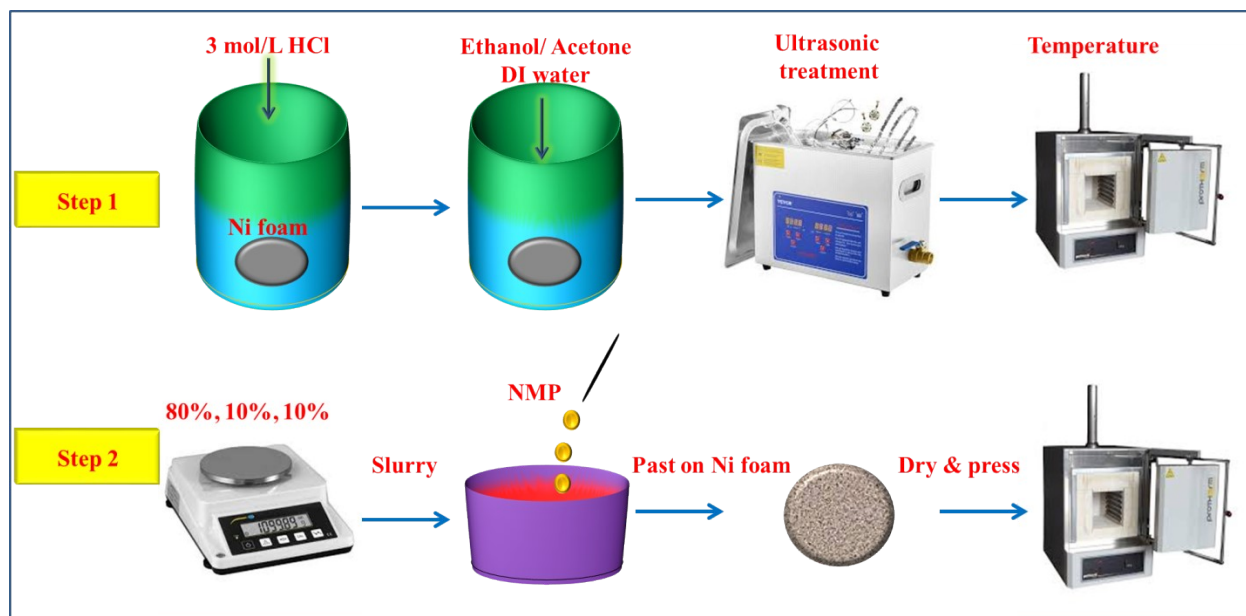

**Fig S2** Schematic representation of electrode preparations
